# Supplementary material
Source: MDPI journal article supplement (https://www.mdpi.com/2073-4352/8/11/415)

# checkCIF/PLATON report

Structure factors have been supplied for datablock(s) test\_0

THIS REPORT IS FOR GUIDANCE ONLY. IF USED AS PART OF A REVIEW PROCEDURE FOR PUBLICATION, IT SHOULD NOT REPLACE THE EXPERTISE OF AN EXPERIENCED CRYSTALLOGRAPHIC REFEREE.

No syntax errors found.      CIF dictionary      Interpreting this report

## Datablock: test\_0

---

Bond precision:    C-C = 0.0158 Å                      Wavelength=0.71073

Cell:                      a=21.658(2)              b=13.7647(15)              c=15.5895(17)  
                            alpha=90              beta=90              gamma=90  
Temperature:              150 K

|                | Calculated             | Reported         |
|----------------|------------------------|------------------|
| Volume         | 4647.5(8)              | 4647.4(9)        |
| Space group    | P b c n                | Pbcn             |
| Hall group     | -P 2n 2ab              | ?                |
| Moiety formula | C16 H8 Au2 Fe N8, C3 N | ?                |
| Sum formula    | C19 H8 Au2 Fe N9       | C19 H8 Au2 Fe N9 |
| Mr             | 812.13                 | 812.13           |
| Dx,g cm-3      | 2.321                  | 2.321            |
| Z              | 8                      | 8                |
| Mu (mm-1)      | 13.235                 | 13.236           |
| F000           | 2952.0                 | 2952.0           |
| F000'          | 2925.97                |                  |
| h,k,lmax       | 28,18,20               | 28,17,20         |
| Nref           | 5451                   | 5443             |
| Tmin,Tmax      | 0.016,0.054            | 0.052,0.159      |
| Tmin'          | 0.000                  |                  |

Correction method= # Reported T Limits: Tmin=0.052 Tmax=0.159  
AbsCorr = EMPIRICAL

Data completeness= 0.999                      Theta(max)= 27.700

R(reflections)= 0.0411( 3533)              wR2(reflections)= 0.1197( 5443)

S = 1.050                      Npar= 284

---

The following ALERTS were generated. Each ALERT has the format

**test-name\_ALERT\_alert-type\_alert-level.**

Click on the hyperlinks for more details of the test.

---

### Alert level A

PLAT430\_ALERT\_2\_A Short Inter D...A Contact N1 ..N10 . 2.57 Ang.  
3/2-x,3/2-y,1/2+z = 2\_665 Check

**Author Response: The guest molecules should be dynamic positional disorder. So, the steric hindrance between N(1), N(6) and guest molecules should be avoided by the rotational motion.**

PLAT430\_ALERT\_2\_A Short Inter D...A Contact N6 ..N10 . 2.33 Ang.  
3/2-x,3/2-y,1/2+z = 2\_665 Check

**Author Response: The guest molecules should be dynamic positional disorder. So, the steric hindrance between N(1), N(6) and guest molecules should be avoided by the rotational motion.**

---

### Alert level B

PLAT216\_ALERT\_3\_B Disordered C19 (An/Solv) ADP max/min Ratio 7.9 Note  
PLAT934\_ALERT\_3\_B Number of (Iobs-Icalc)/SigmaW > 10 Outliers .... 2 Check

---

### Alert level C

PLAT220\_ALERT\_2\_C Non-Solvent Resd 1 N Ueq(max)/Ueq(min) Range 3.9 Ratio  
PLAT234\_ALERT\_4\_C Large Hirshfeld Difference C5 --C6 0.19 Ang.  
PLAT234\_ALERT\_4\_C Large Hirshfeld Difference N9 --C22 0.18 Ang.  
PLAT234\_ALERT\_4\_C Large Hirshfeld Difference C21 --C22 0.16 Ang.  
PLAT342\_ALERT\_3\_C Low Bond Precision on C-C Bonds ..... 0.0158 Ang.  
PLAT971\_ALERT\_2\_C Check Calcd Resid. Dens. 0.82A From N9 2.07 eA-3  
PLAT971\_ALERT\_2\_C Check Calcd Resid. Dens. 0.04A From N2 1.64 eA-3  
PLAT971\_ALERT\_2\_C Check Calcd Resid. Dens. 0.70A From C18 1.51 eA-3  
PLAT972\_ALERT\_2\_C Check Calcd Resid. Dens. 0.09A From C22 -2.08 eA-3  
PLAT972\_ALERT\_2\_C Check Calcd Resid. Dens. 0.13A From C20 -1.90 eA-3  
PLAT972\_ALERT\_2\_C Check Calcd Resid. Dens. 0.07A From N10 -1.86 eA-3  
PLAT972\_ALERT\_2\_C Check Calcd Resid. Dens. 0.24A From N9 -1.80 eA-3

---

### Alert level G

PLAT002\_ALERT\_2\_G Number of Distance or Angle Restraints on AtSite 8 Note  
PLAT004\_ALERT\_5\_G Polymeric Structure Found with Maximum Dimension 2 Info  
PLAT005\_ALERT\_5\_G No Embedded Refinement Details Found in the CIF Please Do !  
PLAT083\_ALERT\_2\_G SHELXL Second Parameter in WGHT Unusually Large 53.04 Why ?  
PLAT300\_ALERT\_4\_G Atom Site Occupancy of N9 Constrained at 0.5 Check  
PLAT300\_ALERT\_4\_G Atom Site Occupancy of N10 Constrained at 0.5 Check  
PLAT300\_ALERT\_4\_G Atom Site Occupancy of C17 Constrained at 0.5 Check  
PLAT300\_ALERT\_4\_G Atom Site Occupancy of C18 Constrained at 0.5 Check  
PLAT300\_ALERT\_4\_G Atom Site Occupancy of C19 Constrained at 0.5 Check  
PLAT300\_ALERT\_4\_G Atom Site Occupancy of C20 Constrained at 0.5 Check  
PLAT300\_ALERT\_4\_G Atom Site Occupancy of C21 Constrained at 0.5 Check  
PLAT302\_ALERT\_4\_G Anion/Solvent/Minor-Residue Disorder (Resd 2 ) 88% Note  
PLAT432\_ALERT\_2\_G Short Inter X...Y Contact N10 ..C14 2.83 Ang.  
3/2-x,3/2-y,-1/2+z = 2\_664 Check

|                                                                    |                      |             |
|--------------------------------------------------------------------|----------------------|-------------|
| PLAT432_ALERT_2_G Short Inter X...Y Contact                        | N10 ..C1             | 2.84 Ang.   |
|                                                                    | 3/2-x,3/2-y,-1/2+z = | 2_664 Check |
| PLAT432_ALERT_2_G Short Inter X...Y Contact                        | C1 ..C20             | 2.97 Ang.   |
|                                                                    | 3/2-x,3/2-y,1/2+z =  | 2_665 Check |
| PLAT432_ALERT_2_G Short Inter X...Y Contact                        | C10 ..C18            | 3.16 Ang.   |
|                                                                    | 1-x,y,3/2-z =        | 3_656 Check |
| PLAT764_ALERT_4_G Overcomplete CIF Bond List Detected (Rep/Expd)   | .                    | 1.21 Ratio  |
| PLAT860_ALERT_3_G Number of Least-Squares Restraints               | .....                | 16 Note     |
| PLAT899_ALERT_4_G SHELXL97 is Deprecated and Succeeded by SHELXL   |                      | 2018 Note   |
| PLAT912_ALERT_4_G Missing # of FCF Reflections Above STh/L=        | 0.600                | 7 Note      |
| PLAT978_ALERT_2_G Number C-C Bonds with Positive Residual Density. |                      | 1 Info      |

---

2 **ALERT level A** = Most likely a serious problem - resolve or explain  
 2 **ALERT level B** = A potentially serious problem, consider carefully  
 12 **ALERT level C** = Check. Ensure it is not caused by an omission or oversight  
 21 **ALERT level G** = General information/check it is not something unexpected

0 ALERT type 1 CIF construction/syntax error, inconsistent or missing data  
 17 ALERT type 2 Indicator that the structure model may be wrong or deficient  
 4 ALERT type 3 Indicator that the structure quality may be low  
 14 ALERT type 4 Improvement, methodology, query or suggestion  
 2 ALERT type 5 Informative message, check

---

It is advisable to attempt to resolve as many as possible of the alerts in all categories. Often the minor alerts point to easily fixed oversights, errors and omissions in your CIF or refinement strategy, so attention to these fine details can be worthwhile. In order to resolve some of the more serious problems it may be necessary to carry out additional measurements or structure refinements. However, the purpose of your study may justify the reported deviations and the more serious of these should normally be commented upon in the discussion or experimental section of a paper or in the "special\_details" fields of the CIF. checkCIF was carefully designed to identify outliers and unusual parameters, but every test has its limitations and alerts that are not important in a particular case may appear. Conversely, the absence of alerts does not guarantee there are no aspects of the results needing attention. It is up to the individual to critically assess their own results and, if necessary, seek expert advice.

### Publication of your CIF in IUCr journals

A basic structural check has been run on your CIF. These basic checks will be run on all CIFs submitted for publication in IUCr journals (*Acta Crystallographica*, *Journal of Applied Crystallography*, *Journal of Synchrotron Radiation*); however, if you intend to submit to *Acta Crystallographica Section C* or *E* or *IUCrData*, you should make sure that full publication checks are run on the final version of your CIF prior to submission.

### Publication of your CIF in other journals

Please refer to the *Notes for Authors* of the relevant journal for any special instructions relating to CIF submission.

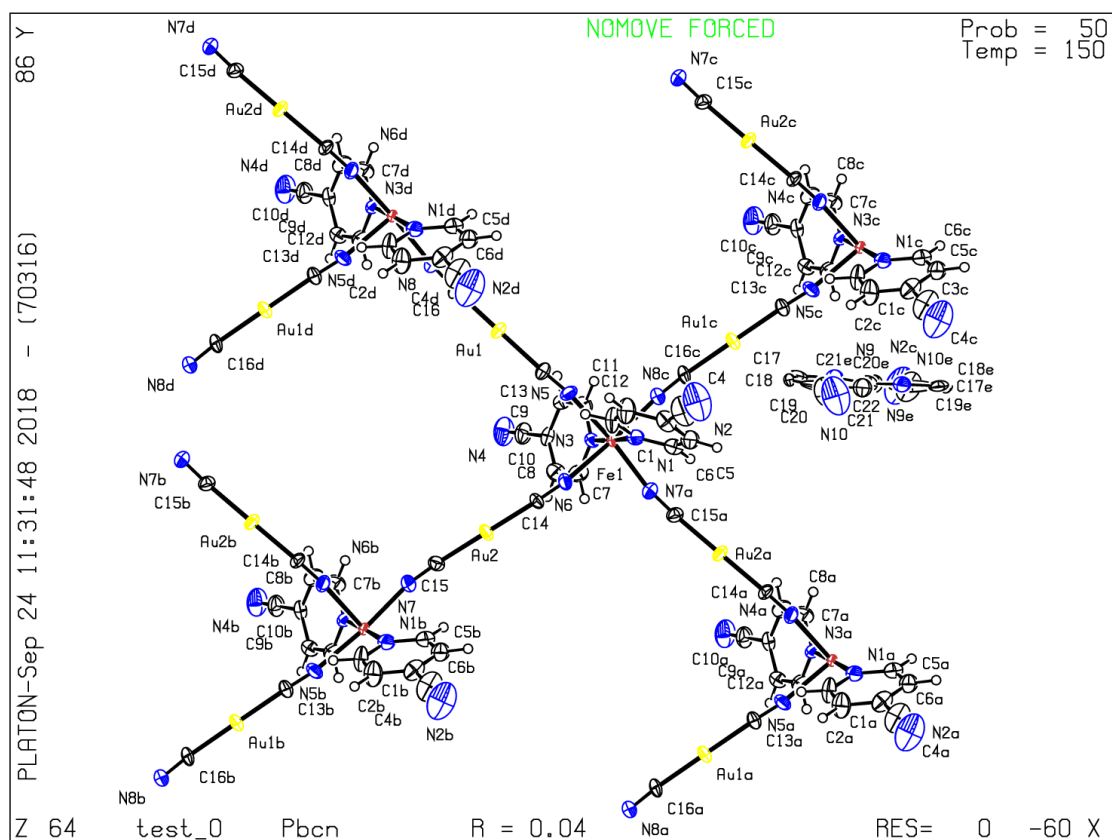

Supplement: s1 [file s1]
