# Supplementary material
Source: MDPI journal article supplement (https://www.mdpi.com/2073-4352/8/11/415)

# checkCIF/PLATON report

Structure factors have been supplied for datablock(s) 091209f

THIS REPORT IS FOR GUIDANCE ONLY. IF USED AS PART OF A REVIEW PROCEDURE FOR PUBLICATION, IT SHOULD NOT REPLACE THE EXPERTISE OF AN EXPERIENCED CRYSTALLOGRAPHIC REFEREE.

No syntax errors found.      CIF dictionary      Interpreting this report

## Datablock: 091209f

---

|                 |                        |                                 |
|-----------------|------------------------|---------------------------------|
| Bond precision: | C-C = 0.0120 Å         | Wavelength=0.71073              |
| Cell:           | a=7.6243(4)            | b=29.1960(16)      c=13.5000(7) |
|                 | alpha=90               | beta=90      gamma=90           |
| Temperature:    | 90 K                   |                                 |
|                 | Calculated             | Reported                        |
| Volume          | 3005.1(3)              | 3005.1(3)                       |
| Space group     | P n m a                | Pnma                            |
| Hall group      | -P 2ac 2n              | ?                               |
| Moiety formula  | C20 H11 Au4 Fe2 N12 O2 | ?                               |
| Sum formula     | C20 H11 Au4 Fe2 N12 O2 | C20 H11 Au4 Fe2 N12 O2          |
| Mr              | 1350.99                | 1350.97                         |
| Dx,g cm-3       | 2.986                  | 2.986                           |
| Z               | 4                      | 4                               |
| Mu (mm-1)       | 20.434                 | 20.434                          |
| F000            | 2396.0                 | 2396.0                          |
| F000'           | 2370.73                |                                 |
| h,k,lmax        | 10,38,18               | 10,38,18                        |
| Nref            | 3811                   | 3808                            |
| Tmin,Tmax       | 0.035,0.360            | 0.048,0.428                     |
| Tmin'           | 0.000                  |                                 |

Correction method= # Reported T Limits: Tmin=0.048 Tmax=0.428  
AbsCorr = EMPIRICAL

Data completeness= 0.999      Theta(max)= 28.310

R(reflections)= 0.0396( 3586)      wR2(reflections)= 0.1212( 3808)

S = 1.413      Npar= 186

---

The following ALERTS were generated. Each ALERT has the format

**test-name\_ALERT\_alert-type\_alert-level.**

Click on the hyperlinks for more details of the test.

---

### Alert level B

|                   |                                                  |                             |        |        |
|-------------------|--------------------------------------------------|-----------------------------|--------|--------|
| PLAT213_ALERT_2_B | Atom N5                                          | has ADP max/min Ratio ..... | 4.5    | oblate |
| PLAT213_ALERT_2_B | Atom C2                                          | has ADP max/min Ratio ..... | 4.7    | oblate |
| PLAT601_ALERT_2_B | Structure Contains Solvent Accessible VOIDS of . |                             | 130    | Ang**3 |
| PLAT919_ALERT_3_B | Reflection # Likely Affected by the Beamstop ... |                             | 2      | Check  |
| PLAT934_ALERT_3_B | Number of (Iobs-Icalc)/SigmaW > 10 Outliers .... |                             | 2      | Check  |
| PLAT939_ALERT_3_B | Large Value of Not (SHELXL) Weight Optimized S . |                             | 253.51 | Check  |

---

### Alert level C

|                   |                                                  |                           |       |       |
|-------------------|--------------------------------------------------|---------------------------|-------|-------|
| PLAT220_ALERT_2_C | Non-Solvent Resd 1 N                             | Ueq(max)/Ueq(min) Range   | 3.2   | Ratio |
| PLAT222_ALERT_3_C | Non-Solv. Resd 1 H                               | Uiso(max)/Uiso(min) Range | 5.5   | Ratio |
| PLAT342_ALERT_3_C | Low Bond Precision on C-C Bonds .....            |                           | 0.012 | Ang.  |
| PLAT355_ALERT_3_C | Long O-H (X0.82,N0.98A) O1                       | - H3                      | 1.01  | Ang.  |
| PLAT355_ALERT_3_C | Long O-H (X0.82,N0.98A) O1                       | - H3_i                    | 1.01  | Ang.  |
| PLAT790_ALERT_4_C | Centre of Gravity not Within Unit Cell: Resd. #  |                           | 1     | Note  |
|                   | C20 H11 Au4 Fe2 N12 O2                           |                           |       |       |
| PLAT906_ALERT_3_C | Large K Value in the Analysis of Variance .....  |                           | 5.307 | Check |
| PLAT918_ALERT_3_C | Reflection(s) with I(obs) much Smaller I(calc) . |                           | 2     | Check |
| PLAT971_ALERT_2_C | Check Calcd Resid. Dens. 0.71A                   | From Au1                  | 2.36  | eA-3  |
| PLAT971_ALERT_2_C | Check Calcd Resid. Dens. 0.72A                   | From Au2                  | 2.28  | eA-3  |
| PLAT971_ALERT_2_C | Check Calcd Resid. Dens. 1.03A                   | From C2                   | 1.98  | eA-3  |
| PLAT971_ALERT_2_C | Check Calcd Resid. Dens. 0.76A                   | From Au1                  | 1.85  | eA-3  |
| PLAT971_ALERT_2_C | Check Calcd Resid. Dens. 2.91A                   | From N2                   | 1.68  | eA-3  |
| PLAT972_ALERT_2_C | Check Calcd Resid. Dens. 1.83A                   | From C1                   | -1.80 | eA-3  |
| PLAT972_ALERT_2_C | Check Calcd Resid. Dens. 1.80A                   | From Au2                  | -1.76 | eA-3  |
| PLAT972_ALERT_2_C | Check Calcd Resid. Dens. 1.02A                   | From Au2                  | -1.75 | eA-3  |
| PLAT972_ALERT_2_C | Check Calcd Resid. Dens. 1.17A                   | From Au2                  | -1.75 | eA-3  |
| PLAT972_ALERT_2_C | Check Calcd Resid. Dens. 1.21A                   | From Au2                  | -1.67 | eA-3  |
| PLAT972_ALERT_2_C | Check Calcd Resid. Dens. 1.19A                   | From C9                   | -1.60 | eA-3  |
| PLAT972_ALERT_2_C | Check Calcd Resid. Dens. 1.21A                   | From Au2                  | -1.56 | eA-3  |
| PLAT972_ALERT_2_C | Check Calcd Resid. Dens. 1.23A                   | From C10                  | -1.55 | eA-3  |
| PLAT972_ALERT_2_C | Check Calcd Resid. Dens. 1.19A                   | From Au2                  | -1.53 | eA-3  |
| PLAT972_ALERT_2_C | Check Calcd Resid. Dens. 1.31A                   | From Au2                  | -1.51 | eA-3  |
| PLAT972_ALERT_2_C | Check Calcd Resid. Dens. 1.31A                   | From Au2                  | -1.51 | eA-3  |
| PLAT977_ALERT_2_C | Check Negative Difference Density on H1          |                           | -0.33 | eA-3  |
| PLAT977_ALERT_2_C | Check Negative Difference Density on H6          |                           | -0.32 | eA-3  |
| PLAT978_ALERT_2_C | Number C-C Bonds with Positive Residual Density. |                           | 0     | Info  |

---

### Alert level G

|                   |                                                  |                |             |        |
|-------------------|--------------------------------------------------|----------------|-------------|--------|
| PLAT004_ALERT_5_G | Polymeric Structure Found with Maximum Dimension |                | 3           | Info   |
| PLAT005_ALERT_5_G | No Embedded Refinement Details Found in the CIF  |                | Please Do ! |        |
| PLAT007_ALERT_5_G | Number of Unrefined Donor-H Atoms .....          |                | 1           | Report |
| PLAT083_ALERT_2_G | SHELXL Second Parameter in WGHT Unusually Large  |                | 33.24       | Why ?  |
| PLAT300_ALERT_4_G | Atom Site Occupancy of H4                        | Constrained at | 0.5         | Check  |
| PLAT764_ALERT_4_G | Overcomplete CIF Bond List Detected (Rep/Expd) . |                | 1.18        | Ratio  |
| PLAT899_ALERT_4_G | SHELXL97 is Deprecated and Succeeded by SHELXL   |                | 2018        | Note   |
| PLAT912_ALERT_4_G | Missing # of FCF Reflections Above STh/L= 0.600  |                | 3           | Note   |

---

- 0 **ALERT level A** = Most likely a serious problem - resolve or explain  
6 **ALERT level B** = A potentially serious problem, consider carefully  
27 **ALERT level C** = Check. Ensure it is not caused by an omission or oversight  
8 **ALERT level G** = General information/check it is not something unexpected

- 0 ALERT type 1 CIF construction/syntax error, inconsistent or missing data  
24 ALERT type 2 Indicator that the structure model may be wrong or deficient  
9 ALERT type 3 Indicator that the structure quality may be low  
5 ALERT type 4 Improvement, methodology, query or suggestion  
3 ALERT type 5 Informative message, check

---

---

It is advisable to attempt to resolve as many as possible of the alerts in all categories. Often the minor alerts point to easily fixed oversights, errors and omissions in your CIF or refinement strategy, so attention to these fine details can be worthwhile. In order to resolve some of the more serious problems it may be necessary to carry out additional measurements or structure refinements. However, the purpose of your study may justify the reported deviations and the more serious of these should normally be commented upon in the discussion or experimental section of a paper or in the "special\_details" fields of the CIF. checkCIF was carefully designed to identify outliers and unusual parameters, but every test has its limitations and alerts that are not important in a particular case may appear. Conversely, the absence of alerts does not guarantee there are no aspects of the results needing attention. It is up to the individual to critically assess their own results and, if necessary, seek expert advice.

### **Publication of your CIF in IUCr journals**

A basic structural check has been run on your CIF. These basic checks will be run on all CIFs submitted for publication in IUCr journals (*Acta Crystallographica*, *Journal of Applied Crystallography*, *Journal of Synchrotron Radiation*); however, if you intend to submit to *Acta Crystallographica Section C* or *E* or *IUCrData*, you should make sure that full publication checks are run on the final version of your CIF prior to submission.

### **Publication of your CIF in other journals**

Please refer to the *Notes for Authors* of the relevant journal for any special instructions relating to CIF submission.

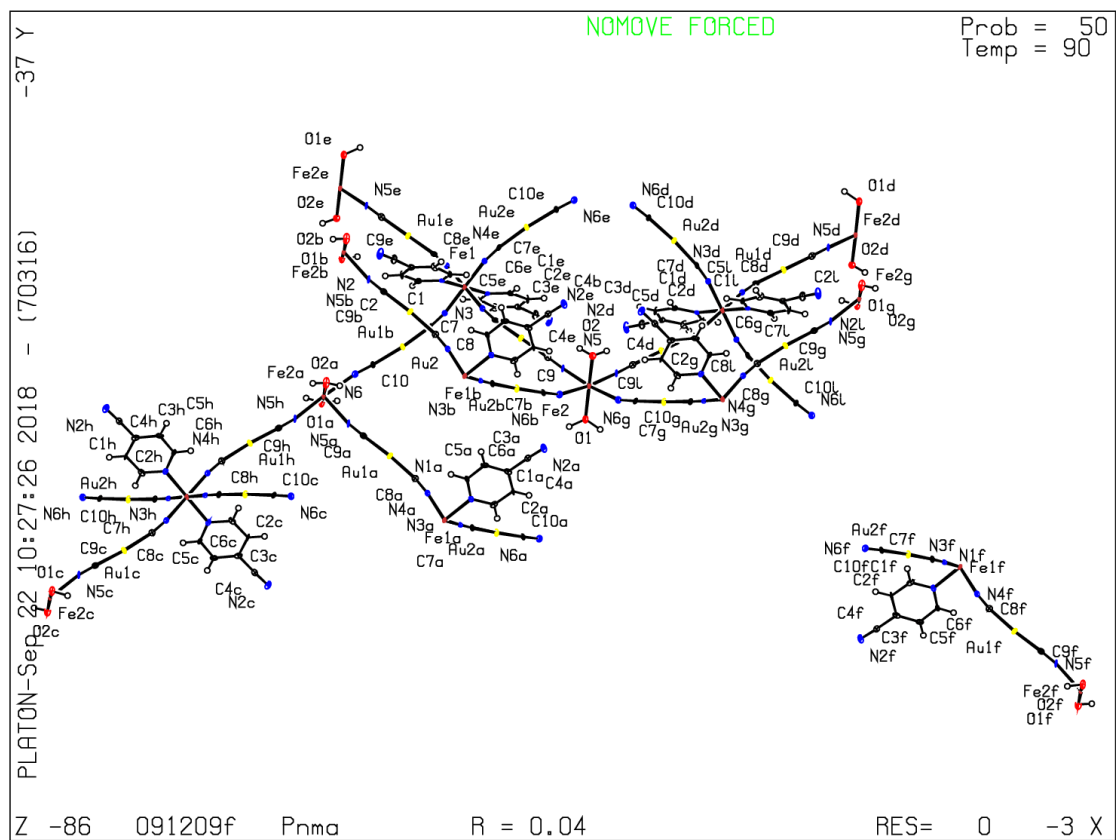

Supplement: s1 [file s1 › supplementary/checkcif_1b_90K.pdf]
