# Supplementary material
Source: MDPI journal article supplement (https://www.mdpi.com/2073-4352/8/11/415)
Supplement: s1 [file s1]

Archive with 8 entries (8 files):
- supplementary/~$SI.docx
- supplementary/1a_150K.cif
- supplementary/1b_298K.cif
- supplementary/1b_90K.cif
- supplementary/checkcif_1a_150K.pdf
- supplementary/checkcif_1b_298K.pdf
- supplementary/checkcif_1b_90K.pdf
- supplementary/SI.pdf
