# Supplementary material
Source: MDPI journal article supplement (https://www.mdpi.com/2073-4352/8/11/415)
Supplement: s1 [file s1 › supplementary/1a_150K.cif]

  
data_test_0 
# start Validation Reply Form: A issue
_vrf_PLAT430_test_0              
;
PROBLEM: Short Inter D...A Contact N1 ..N10 . 2.57 Ang.
3/2-x,3/2-y,1/2+z = 2_665 Check

RESPONSE: The guest molecules should be dynamic positional disorder.
So, the steric hindrance between N(1), N(6) and guest molecules should
be avoided by the rotational motion. 

;

# end Validation Reply Form    
_audit_creation_method            SHELXL-97 
_chemical_name_systematic 
; 
 ? 
; 
_chemical_name_common             ? 
_chemical_melting_point           ? 
_chemical_formula_moiety          ? 
_chemical_formula_sum 
 'C19 H8 Au2 Fe N9' 
_chemical_formula_weight          812.13 
  
loop_ 
 _atom_type_symbol 
 _atom_type_description 
 _atom_type_scat_dispersion_real 
 _atom_type_scat_dispersion_imag 
 _atom_type_scat_source 
 'C'  'C'   0.0033   0.0016 
 'International Tables Vol C Tables 4.2.6.8 and 6.1.1.4' 
 'H'  'H'   0.0000   0.0000 
 'International Tables Vol C Tables 4.2.6.8 and 6.1.1.4' 
 'N'  'N'   0.0061   0.0033 
 'International Tables Vol C Tables 4.2.6.8 and 6.1.1.4' 
 'Fe'  'Fe'   0.3463   0.8444 
 'International Tables Vol C Tables 4.2.6.8 and 6.1.1.4' 
 'Au'  'Au'  -2.0133   8.8022 
 'International Tables Vol C Tables 4.2.6.8 and 6.1.1.4' 
  
_symmetry_cell_setting            Orthorhombic 
_symmetry_space_group_name_H-M    Pbcn 
  
loop_ 
 _symmetry_equiv_pos_as_xyz 
 'x, y, z' 
 '-x+1/2, -y+1/2, z+1/2' 
 '-x, y, -z+1/2' 
 'x+1/2, -y+1/2, -z' 
 '-x, -y, -z' 
 'x-1/2, y-1/2, -z-1/2' 
 'x, -y, z-1/2' 
 '-x-1/2, y-1/2, z' 
  
_cell_length_a                    21.658(2) 
_cell_length_b                    13.7647(15) 
_cell_length_c                    15.5895(17) 
_cell_angle_alpha                 90.00 
_cell_angle_beta                  90.00 
_cell_angle_gamma                 90.00 
_cell_volume                      4647.4(9) 
_cell_formula_units_Z             8 
_cell_measurement_temperature     150(2) 
_cell_measurement_reflns_used     3504 
_cell_measurement_theta_min       2.19 
_cell_measurement_theta_max       27.31 
  
_exptl_crystal_description        block 
_exptl_crystal_colour             yellow 
_exptl_crystal_size_max           0.55 
_exptl_crystal_size_mid           0.28 
_exptl_crystal_size_min           0.22 
_exptl_crystal_density_meas       'not measured' 
_exptl_crystal_density_diffrn     2.321 
_exptl_crystal_density_method     'not measured' 
_exptl_crystal_F_000              2952 
_exptl_absorpt_coefficient_mu     13.236 
_exptl_absorpt_correction_type    empirical 
_exptl_absorpt_correction_T_min   0.0516 
_exptl_absorpt_correction_T_max   0.1588 
_exptl_absorpt_process_details    'SADABS; Sheldrick 1996' 
  
_exptl_special_details 
; 
 ? 
; 
  
_diffrn_ambient_temperature       150(2) 
_diffrn_radiation_wavelength      0.71073 
_diffrn_radiation_type            MoK\a 
_diffrn_radiation_source          'fine-focus sealed tube' 
_diffrn_radiation_monochromator   graphite 
_diffrn_measurement_device_type   'CCD area detector' 
_diffrn_measurement_method        'phi and omega scans' 
_diffrn_detector_area_resol_mean  8.333 
_diffrn_standards_number          ? 
_diffrn_standards_interval_count  ? 
_diffrn_standards_interval_time   ? 
_diffrn_standards_decay_%         0 
_diffrn_reflns_number             28466 
_diffrn_reflns_av_R_equivalents   0.0573 
_diffrn_reflns_av_sigmaI/netI     0.0449 
_diffrn_reflns_limit_h_min        -28 
_diffrn_reflns_limit_h_max        28 
_diffrn_reflns_limit_k_min        -17 
_diffrn_reflns_limit_k_max        17 
_diffrn_reflns_limit_l_min        -11 
_diffrn_reflns_limit_l_max        20 
_diffrn_reflns_theta_min          1.75 
_diffrn_reflns_theta_max          27.70 
_reflns_number_total              5443 
_reflns_number_gt                 3533 
_reflns_threshold_expression      >2sigma(I) 
  
_computing_data_collection        'Bruker SMART' 
_computing_cell_refinement        'Bruker SMART' 
_computing_data_reduction         'Bruker SAINT' 
_computing_structure_solution     'SHELXS-97 (Sheldrick, 1990)' 
_computing_structure_refinement   'SHELXL-97 (Sheldrick, 1997)' 
_computing_molecular_graphics     'Bruker SHELXTL' 
_computing_publication_material   'Bruker SHELXTL' 
  
_refine_special_details 
; 
 Refinement of F^2^ against ALL reflections.  The weighted R-factor wR and 
 goodness of fit S are based on F^2^, conventional R-factors R are based 
 on F, with F set to zero for negative F^2^. The threshold expression of 
 F^2^ > 2sigma(F^2^) is used only for calculating R-factors(gt) etc. and is 
 not relevant to the choice of reflections for refinement.  R-factors based 
 on F^2^ are statistically about twice as large as those based on F, and R- 
 factors based on ALL data will be even larger. 
; 
  
_refine_ls_structure_factor_coef  Fsqd 
_refine_ls_matrix_type            full 
_refine_ls_weighting_scheme       calc 
_refine_ls_weighting_details 
 'calc w=1/[\s^2^(Fo^2^)+(0.0399P)^2^+53.0379P] where P=(Fo^2^+2Fc^2^)/3' 
_atom_sites_solution_primary      direct 
_atom_sites_solution_secondary    difmap 
_atom_sites_solution_hydrogens    geom 
_refine_ls_hydrogen_treatment     constr 
_refine_ls_extinction_method      none 
_refine_ls_extinction_coef        ? 
_refine_ls_number_reflns          5443 
_refine_ls_number_parameters      284 
_refine_ls_number_restraints      16 
_refine_ls_R_factor_all           0.0715 
_refine_ls_R_factor_gt            0.0411 
_refine_ls_wR_factor_ref          0.1197 
_refine_ls_wR_factor_gt           0.1043 
_refine_ls_goodness_of_fit_ref    1.050 
_refine_ls_restrained_S_all       1.060 
_refine_ls_shift/su_max           0.005 
_refine_ls_shift/su_mean          0.000 
  
loop_ 
 _atom_site_label 
 _atom_site_type_symbol 
 _atom_site_fract_x 
 _atom_site_fract_y 
 _atom_site_fract_z 
 _atom_site_U_iso_or_equiv 
 _atom_site_adp_type 
 _atom_site_occupancy 
 _atom_site_symmetry_multiplicity 
 _atom_site_calc_flag 
 _atom_site_refinement_flags 
 _atom_site_disorder_assembly 
 _atom_site_disorder_group 
N10 N 0.7074(6) 0.894(2) 0.3255(18) 0.101(5) Uani 0.50 1 d PD . . 
Au1 Au 0.671331(16) 0.99393(3) 1.05060(2) 0.02680(12) Uani 1 1 d . . . 
Au2 Au 0.685152(17) 0.50642(3) 1.04776(2) 0.02696(12) Uani 1 1 d . . . 
C1 C 0.8124(5) 0.8079(10) 0.8012(7) 0.042(3) Uani 1 1 d . . . 
H1 H 0.8011 0.8170 0.8595 0.051 Uiso 1 1 calc R . . 
C2 C 0.8697(6) 0.8374(10) 0.7756(8) 0.051(3) Uani 1 1 d . . . 
H2 H 0.8972 0.8683 0.8144 0.061 Uiso 1 1 calc R . . 
C3 C 0.8866(5) 0.8204(9) 0.6897(7) 0.042(3) Uani 1 1 d . . . 
C4 C 0.9456(7) 0.8526(12) 0.6571(10) 0.072(4) Uani 1 1 d . . . 
C5 C 0.8449(5) 0.7760(8) 0.6348(8) 0.042(2) Uani 1 1 d . . . 
H5 H 0.8556 0.7626 0.5769 0.051 Uiso 1 1 calc R . . 
C6 C 0.7880(7) 0.7517(8) 0.6661(8) 0.049(3) Uani 1 1 d . . . 
H6 H 0.7589 0.7228 0.6282 0.059 Uiso 1 1 calc R . . 
C7 C 0.5491(5) 0.6524(8) 0.8547(7) 0.036(2) Uani 1 1 d . . . 
H7 H 0.5691 0.5936 0.8390 0.043 Uiso 1 1 calc R . . 
C8 C 0.4946(5) 0.6463(8) 0.8995(7) 0.037(2) Uani 1 1 d . . . 
H8 H 0.4777 0.5848 0.9144 0.045 Uiso 1 1 calc R . . 
C9 C 0.4652(4) 0.7296(7) 0.9222(6) 0.028(2) Uani 1 1 d . . . 
C10 C 0.4091(5) 0.7277(8) 0.9720(7) 0.040(3) Uani 1 1 d . . . 
C11 C 0.4894(5) 0.8177(7) 0.8976(6) 0.030(2) Uani 1 1 d . . . 
H11 H 0.4689 0.8768 0.9108 0.037 Uiso 1 1 calc R . . 
C12 C 0.5451(4) 0.8174(7) 0.8524(6) 0.032(2) Uani 1 1 d . . . 
H12 H 0.5623 0.8780 0.8356 0.038 Uiso 1 1 calc R . . 
C13 C 0.6798(4) 0.9037(7) 0.9508(6) 0.027(2) Uani 1 1 d . . . 
C14 C 0.6949(5) 0.5911(7) 0.9455(6) 0.028(2) Uani 1 1 d . . . 
C15 C 0.6704(4) 0.4221(7) 1.1487(6) 0.029(2) Uani 1 1 d . . . 
C16 C 0.6598(4) 1.0842(7) 1.1490(6) 0.028(2) Uani 1 1 d . . . 
C17 C 0.4915(6) 0.9178(10) 0.4002(8) 0.033(5) Uani 0.50 1 d PD . . 
C18 C 0.5521(7) 0.9117(10) 0.4199(11) 0.037(5) Uani 0.50 1 d PD . . 
C19 C 0.5895(5) 0.9042(11) 0.3478(14) 0.096(14) Uani 0.50 1 d PD . . 
C20 C 0.6571(4) 0.897(2) 0.3437(13) 0.072(4) Uani 0.50 1 d PD . . 
C21 C 0.5653(5) 0.9059(16) 0.2641(14) 0.042(2) Uani 0.50 1 d PD . . 
C22 C 0.5000 0.9116(11) 0.2500 0.049(3) Uani 1 2 d SD . . 
Fe1 Fe 0.67411(6) 0.74715(9) 0.79306(7) 0.0185(3) Uani 1 1 d . . . 
N1 N 0.7712(4) 0.7668(6) 0.7478(6) 0.0361(18) Uani 1 1 d . . . 
N2 N 0.9912(6) 0.8813(13) 0.6312(9) 0.101(5) Uani 1 1 d . . . 
N3 N 0.5754(4) 0.7363(5) 0.8319(5) 0.0263(17) Uani 1 1 d . . . 
N4 N 0.3654(5) 0.7257(9) 1.0116(7) 0.062(3) Uani 1 1 d . . . 
N5 N 0.6839(4) 0.8553(6) 0.8927(5) 0.0301(19) Uani 1 1 d . . . 
N6 N 0.6975(4) 0.6424(6) 0.8881(5) 0.0307(19) Uani 1 1 d . . . 
N7 N 0.6633(4) 0.3688(6) 1.2048(5) 0.0303(19) Uani 1 1 d . . . 
N8 N 0.6539(4) 1.1406(6) 1.2018(5) 0.0312(19) Uani 1 1 d . . . 
N9 N 0.4655(5) 0.9180(11) 0.3207(7) 0.0361(18) Uani 0.50 1 d PD . . 
  
loop_ 
 _atom_site_aniso_label 
 _atom_site_aniso_U_11 
 _atom_site_aniso_U_22 
 _atom_site_aniso_U_33 
 _atom_site_aniso_U_23 
 _atom_site_aniso_U_13 
 _atom_site_aniso_U_12 
N10 0.044(7) 0.165(14) 0.095(10) 0.032(9) 0.011(7) -0.006(8) 
Au1 0.0293(2) 0.0283(2) 0.02283(19) -0.01151(16) 0.00090(14) -0.00138(14) 
Au2 0.0321(2) 0.0270(2) 0.02184(19) 0.01056(16) 0.00216(14) 0.00302(15) 
C1 0.029(6) 0.075(9) 0.022(5) 0.002(5) 0.002(4) -0.004(5) 
C2 0.038(7) 0.076(9) 0.038(7) -0.001(6) -0.009(5) -0.003(6) 
C3 0.030(6) 0.050(7) 0.047(7) 0.012(5) 0.007(5) 0.005(5) 
C4 0.041(7) 0.102(11) 0.072(9) 0.019(8) 0.003(7) 0.012(7) 
C5 0.050(7) 0.038(6) 0.039(6) 0.001(4) 0.014(5) 0.001(5) 
C6 0.082(8) 0.027(5) 0.040(5) 0.003(5) -0.007(5) -0.001(6) 
C7 0.032(6) 0.033(6) 0.044(6) -0.006(5) 0.001(5) -0.007(4) 
C8 0.032(6) 0.036(6) 0.044(6) 0.006(5) 0.001(5) -0.009(5) 
C9 0.025(5) 0.041(6) 0.019(4) -0.006(4) 0.001(4) -0.003(4) 
C10 0.038(6) 0.052(7) 0.031(5) -0.003(5) 0.006(5) -0.009(5) 
C11 0.030(5) 0.028(5) 0.034(5) -0.005(4) -0.002(4) 0.002(4) 
C12 0.031(5) 0.032(5) 0.032(5) 0.006(4) 0.003(5) -0.005(4) 
C13 0.026(5) 0.033(5) 0.023(5) -0.008(4) -0.004(4) -0.003(4) 
C14 0.037(6) 0.025(5) 0.022(5) 0.008(4) -0.002(4) 0.007(4) 
C15 0.030(5) 0.024(5) 0.031(5) 0.004(4) 0.005(4) 0.004(4) 
C16 0.030(5) 0.037(6) 0.018(5) -0.009(4) -0.008(4) 0.000(4) 
C17 0.042(12) 0.013(9) 0.044(12) 0.006(8) 0.006(10) 0.004(8) 
C18 0.079(17) 0.017(9) 0.016(9) 0.002(7) 0.020(10) -0.001(10) 
C19 0.029(13) 0.015(11) 0.25(4) 0.020(19) 0.01(2) 0.016(10) 
C20 0.041(7) 0.102(11) 0.072(9) 0.019(8) 0.003(7) 0.012(7) 
C21 0.050(7) 0.038(6) 0.039(6) 0.001(4) 0.014(5) 0.001(5) 
C22 0.082(8) 0.027(5) 0.040(5) 0.003(5) -0.007(5) -0.001(6) 
Fe1 0.0286(7) 0.0163(6) 0.0107(5) 0.0012(5) 0.0020(5) 0.0011(5) 
N1 0.048(5) 0.026(4) 0.034(4) 0.000(3) 0.010(4) 0.001(3) 
N2 0.044(7) 0.165(14) 0.095(10) 0.032(9) 0.011(7) -0.006(8) 
N3 0.032(5) 0.022(4) 0.024(4) 0.004(3) 0.006(3) 0.000(3) 
N4 0.046(7) 0.092(9) 0.047(6) -0.001(6) 0.014(5) -0.018(6) 
N5 0.037(5) 0.024(4) 0.030(4) -0.010(4) -0.001(4) 0.003(3) 
N6 0.042(5) 0.031(5) 0.020(4) 0.005(3) 0.004(4) 0.008(4) 
N7 0.034(5) 0.031(5) 0.025(4) 0.005(3) 0.003(4) -0.002(4) 
N8 0.040(5) 0.030(5) 0.024(4) -0.005(3) 0.002(4) 0.000(4) 
N9 0.048(5) 0.026(4) 0.034(4) 0.000(3) 0.010(4) 0.001(3) 
  
_geom_special_details 
; 
 All esds (except the esd in the dihedral angle between two l.s. planes) 
 are estimated using the full covariance matrix.  The cell esds are taken 
 into account individually in the estimation of esds in distances, angles 
 and torsion angles; correlations between esds in cell parameters are only 
 used when they are defined by crystal symmetry.  An approximate (isotropic) 
 treatment of cell esds is used for estimating esds involving l.s. planes. 
; 
  
loop_ 
 _geom_bond_atom_site_label_1 
 _geom_bond_atom_site_label_2 
 _geom_bond_distance 
 _geom_bond_site_symmetry_2 
 _geom_bond_publ_flag 
N10 C20 1.127(8) . ? 
Au1 C16 1.990(9) . ? 
Au1 C13 1.999(9) . ? 
Au1 Au2 3.1133(6) 8_765 ? 
Au2 C15 1.981(10) . ? 
Au2 C14 1.986(9) . ? 
Au2 Au1 3.1133(6) 8_755 ? 
C1 N1 1.345(14) . ? 
C1 C2 1.364(16) . ? 
C1 H1 0.9500 . ? 
C2 C3 1.408(16) . ? 
C2 H2 0.9500 . ? 
C3 C5 1.386(16) . ? 
C3 C4 1.444(18) . ? 
C4 N2 1.138(18) . ? 
C5 C6 1.367(17) . ? 
C5 H5 0.9500 . ? 
C6 N1 1.340(14) . ? 
C6 H6 0.9500 . ? 
C7 N3 1.336(12) . ? 
C7 C8 1.374(14) . ? 
C7 H7 0.9500 . ? 
C8 C9 1.359(14) . ? 
C8 H8 0.9500 . ? 
C9 C11 1.375(13) . ? 
C9 C10 1.443(14) . ? 
C10 N4 1.130(14) . ? 
C11 C12 1.397(13) . ? 
C11 H11 0.9500 . ? 
C12 N3 1.334(12) . ? 
C12 H12 0.9500 . ? 
C13 N5 1.129(11) . ? 
C14 N6 1.141(11) . ? 
C15 N7 1.152(12) . ? 
C16 N8 1.138(11) . ? 
C17 C18 1.349(10) . ? 
C17 N9 1.363(9) . ? 
C18 C19 1.39(2) . ? 
C19 C21 1.407(10) . ? 
C19 C20 1.469(8) . ? 
C21 C22 1.433(10) . ? 
C21 N9 1.49(2) 3_655 ? 
C22 N9 1.334(8) 3_655 ? 
C22 N9 1.334(8) . ? 
C22 C21 1.433(10) 3_655 ? 
Fe1 N7 2.121(8) 7_565 ? 
Fe1 N6 2.129(8) . ? 
Fe1 N8 2.146(8) 7_575 ? 
Fe1 N5 2.161(8) . ? 
Fe1 N3 2.227(8) . ? 
Fe1 N1 2.234(9) . ? 
N7 Fe1 2.121(8) 7_566 ? 
N8 Fe1 2.146(8) 7_576 ? 
N9 C21 1.49(2) 3_655 ? 
  
loop_ 
 _geom_angle_atom_site_label_1 
 _geom_angle_atom_site_label_2 
 _geom_angle_atom_site_label_3 
 _geom_angle 
 _geom_angle_site_symmetry_1 
 _geom_angle_site_symmetry_3 
 _geom_angle_publ_flag 
C16 Au1 C13 178.0(4) . . ? 
C16 Au1 Au2 95.8(3) . 8_765 ? 
C13 Au1 Au2 86.1(3) . 8_765 ? 
C15 Au2 C14 176.8(4) . . ? 
C15 Au2 Au1 96.7(3) . 8_755 ? 
C14 Au2 Au1 86.4(3) . 8_755 ? 
N1 C1 C2 123.2(10) . . ? 
N1 C1 H1 118.4 . . ? 
C2 C1 H1 118.4 . . ? 
C1 C2 C3 117.7(11) . . ? 
C1 C2 H2 121.1 . . ? 
C3 C2 H2 121.1 . . ? 
C5 C3 C2 119.4(11) . . ? 
C5 C3 C4 119.7(12) . . ? 
C2 C3 C4 120.9(12) . . ? 
N2 C4 C3 177.5(18) . . ? 
C6 C5 C3 118.4(11) . . ? 
C6 C5 H5 120.8 . . ? 
C3 C5 H5 120.8 . . ? 
N1 C6 C5 123.1(12) . . ? 
N1 C6 H6 118.5 . . ? 
C5 C6 H6 118.5 . . ? 
N3 C7 C8 123.7(10) . . ? 
N3 C7 H7 118.2 . . ? 
C8 C7 H7 118.2 . . ? 
C9 C8 C7 118.8(10) . . ? 
C9 C8 H8 120.6 . . ? 
C7 C8 H8 120.6 . . ? 
C8 C9 C11 119.5(9) . . ? 
C8 C9 C10 121.3(9) . . ? 
C11 C9 C10 119.2(9) . . ? 
N4 C10 C9 179.3(14) . . ? 
C9 C11 C12 117.9(9) . . ? 
C9 C11 H11 121.0 . . ? 
C12 C11 H11 121.0 . . ? 
N3 C12 C11 123.2(9) . . ? 
N3 C12 H12 118.4 . . ? 
C11 C12 H12 118.4 . . ? 
N5 C13 Au1 177.6(9) . . ? 
N6 C14 Au2 176.1(9) . . ? 
N7 C15 Au2 176.1(9) . . ? 
N8 C16 Au1 175.6(9) . . ? 
C18 C17 N9 127.6(12) . . ? 
C17 C18 C19 112.9(14) . . ? 
C18 C19 C21 122.1(11) . . ? 
C18 C19 C20 128.5(17) . . ? 
C21 C19 C20 109.4(12) . . ? 
N10 C20 C19 168(2) . . ? 
C19 C21 C22 120.7(13) . . ? 
C19 C21 N9 172.7(16) . 3_655 ? 
C22 C21 N9 54.3(6) . 3_655 ? 
N9 C22 N9 172.5(19) 3_655 . ? 
N9 C22 C21 65.0(10) 3_655 . ? 
N9 C22 C21 115.5(10) . . ? 
N9 C22 C21 115.5(10) 3_655 3_655 ? 
N9 C22 C21 65.0(10) . 3_655 ? 
C21 C22 C21 174(2) . 3_655 ? 
N7 Fe1 N6 88.2(3) 7_565 . ? 
N7 Fe1 N8 95.1(3) 7_565 7_575 ? 
N6 Fe1 N8 176.4(3) . 7_575 ? 
N7 Fe1 N5 174.6(3) 7_565 . ? 
N6 Fe1 N5 86.8(3) . . ? 
N8 Fe1 N5 90.0(3) 7_575 . ? 
N7 Fe1 N3 91.1(3) 7_565 . ? 
N6 Fe1 N3 89.6(3) . . ? 
N8 Fe1 N3 91.9(3) 7_575 . ? 
N5 Fe1 N3 86.9(3) . . ? 
N7 Fe1 N1 89.4(3) 7_565 . ? 
N6 Fe1 N1 94.5(3) . . ? 
N8 Fe1 N1 84.0(3) 7_575 . ? 
N5 Fe1 N1 93.0(3) . . ? 
N3 Fe1 N1 175.9(3) . . ? 
C6 N1 C1 118.2(10) . . ? 
C6 N1 Fe1 122.5(8) . . ? 
C1 N1 Fe1 118.7(7) . . ? 
C12 N3 C7 116.8(9) . . ? 
C12 N3 Fe1 118.7(6) . . ? 
C7 N3 Fe1 122.7(7) . . ? 
C13 N5 Fe1 167.4(8) . . ? 
C14 N6 Fe1 162.4(8) . . ? 
C15 N7 Fe1 163.2(8) . 7_566 ? 
C16 N8 Fe1 161.3(9) . 7_576 ? 
C22 N9 C17 121.2(8) . . ? 
C22 N9 C21 60.7(7) . 3_655 ? 
C17 N9 C21 173.1(16) . 3_655 ? 
  
_diffrn_measured_fraction_theta_max    0.998 
_diffrn_reflns_theta_full              27.70 
_diffrn_measured_fraction_theta_full   0.998 
_refine_diff_density_max    1.973 
_refine_diff_density_min   -2.230 
_refine_diff_density_rms    0.220 
