# Supplementary material
Source: MDPI journal article supplement (https://www.mdpi.com/2073-4352/8/11/415)
Supplement: s1 [file s1 › supplementary/1b_90K.cif]

  
data_091209f 
  
_audit_creation_method            SHELXL-97 
_chemical_name_systematic 
; 
 ? 
; 
_chemical_name_common             ? 
_chemical_melting_point           ? 
_chemical_formula_moiety          ? 
_chemical_formula_sum 
 'C20 H11 Au4 Fe2 N12 O2' 
_chemical_formula_weight          1350.97 
  
loop_ 
 _atom_type_symbol 
 _atom_type_description 
 _atom_type_scat_dispersion_real 
 _atom_type_scat_dispersion_imag 
 _atom_type_scat_source 
 'C'  'C'   0.0033   0.0016 
 'International Tables Vol C Tables 4.2.6.8 and 6.1.1.4' 
 'H'  'H'   0.0000   0.0000 
 'International Tables Vol C Tables 4.2.6.8 and 6.1.1.4' 
 'N'  'N'   0.0061   0.0033 
 'International Tables Vol C Tables 4.2.6.8 and 6.1.1.4' 
 'O'  'O'   0.0106   0.0060 
 'International Tables Vol C Tables 4.2.6.8 and 6.1.1.4' 
 'Fe'  'Fe'   0.3463   0.8444 
 'International Tables Vol C Tables 4.2.6.8 and 6.1.1.4' 
 'Au'  'Au'  -2.0133   8.8022 
 'International Tables Vol C Tables 4.2.6.8 and 6.1.1.4' 
  
_symmetry_cell_setting            Orthorhombic 
_symmetry_space_group_name_H-M    Pnma 
  
loop_ 
 _symmetry_equiv_pos_as_xyz 
 'x, y, z' 
 '-x+1/2, -y, z+1/2' 
 '-x, y+1/2, -z' 
 'x+1/2, -y+1/2, -z+1/2' 
 '-x, -y, -z' 
 'x-1/2, y, -z-1/2' 
 'x, -y-1/2, z' 
 '-x-1/2, y-1/2, z-1/2' 
  
_cell_length_a                    7.6243(4) 
_cell_length_b                    29.1960(16) 
_cell_length_c                    13.5000(7) 
_cell_angle_alpha                 90.00 
_cell_angle_beta                  90.00 
_cell_angle_gamma                 90.00 
_cell_volume                      3005.1(3) 
_cell_formula_units_Z             4 
_cell_measurement_temperature     90(2) 
_cell_measurement_reflns_used     9279
_cell_measurement_theta_min       5.160
_cell_measurement_theta_max       56.589 
  
_exptl_crystal_description        block 
_exptl_crystal_colour             purple 
_exptl_crystal_size_max           0.38 
_exptl_crystal_size_mid           0.15 
_exptl_crystal_size_min           0.05 
_exptl_crystal_density_meas       'not measured' 
_exptl_crystal_density_diffrn     2.986 
_exptl_crystal_density_method     'not measured' 
_exptl_crystal_F_000              2396 
_exptl_absorpt_coefficient_mu     20.434 
_exptl_absorpt_correction_type    empirical 
_exptl_absorpt_correction_T_min   0.0478 
_exptl_absorpt_correction_T_max   0.4281 
_exptl_absorpt_process_details    'SADABS; Sheldrick 1996' 
  
_exptl_special_details 
; 
 ? 
; 
  
_diffrn_ambient_temperature       90(2) 
_diffrn_radiation_wavelength      0.71073 
_diffrn_radiation_type            MoK\a 
_diffrn_radiation_source          'fine-focus sealed tube' 
_diffrn_radiation_monochromator   graphite 
_diffrn_measurement_device_type   'CCD area detector' 
_diffrn_measurement_method        'phi and omega scans' 
_diffrn_detector_area_resol_mean  8.366 
_diffrn_standards_number          ? 
_diffrn_standards_interval_count  ? 
_diffrn_standards_interval_time   ? 
_diffrn_standards_decay_%         0 
_diffrn_reflns_number             20977 
_diffrn_reflns_av_R_equivalents   0.0339 
_diffrn_reflns_av_sigmaI/netI     0.0273 
_diffrn_reflns_limit_h_min        -10 
_diffrn_reflns_limit_h_max        10 
_diffrn_reflns_limit_k_min        -38 
_diffrn_reflns_limit_k_max        18 
_diffrn_reflns_limit_l_min        -18 
_diffrn_reflns_limit_l_max        17 
_diffrn_reflns_theta_min          1.39 
_diffrn_reflns_theta_max          28.31 
_reflns_number_total              3808 
_reflns_number_gt                 3586 
_reflns_threshold_expression      >2sigma(I) 
  
_computing_data_collection        'Bruker SMART' 
_computing_cell_refinement        'Bruker SMART' 
_computing_data_reduction         'Bruker SAINT' 
_computing_structure_solution     'SHELXS-97 (Sheldrick, 1990)' 
_computing_structure_refinement   'SHELXL-97 (Sheldrick, 1997)' 
_computing_molecular_graphics     'Bruker SHELXTL' 
_computing_publication_material   'Bruker SHELXTL' 
  
_refine_special_details 
; 
 Refinement of F^2^ against ALL reflections.  The weighted R-factor wR and 
 goodness of fit S are based on F^2^, conventional R-factors R are based 
 on F, with F set to zero for negative F^2^. The threshold expression of 
 F^2^ > 2sigma(F^2^) is used only for calculating R-factors(gt) etc. and is 
 not relevant to the choice of reflections for refinement.  R-factors based 
 on F^2^ are statistically about twice as large as those based on F, and R- 
 factors based on ALL data will be even larger. 
; 
  
_refine_ls_structure_factor_coef  Fsqd 
_refine_ls_matrix_type            full 
_refine_ls_weighting_scheme       calc 
_refine_ls_weighting_details 
 'calc w=1/[\s^2^(Fo^2^)+(0.0485P)^2^+33.2369P] where P=(Fo^2^+2Fc^2^)/3' 
_atom_sites_solution_primary      direct 
_atom_sites_solution_secondary    difmap 
_atom_sites_solution_hydrogens    geom 
_refine_ls_hydrogen_treatment     mixed 
_refine_ls_extinction_method      none 
_refine_ls_extinction_coef        ? 
_refine_ls_number_reflns          3808 
_refine_ls_number_parameters      186 
_refine_ls_number_restraints      0 
_refine_ls_R_factor_all           0.0439 
_refine_ls_R_factor_gt            0.0396 
_refine_ls_wR_factor_ref          0.1212 
_refine_ls_wR_factor_gt           0.1048 
_refine_ls_goodness_of_fit_ref    1.413 
_refine_ls_restrained_S_all       1.413 
_refine_ls_shift/su_max           0.028 
_refine_ls_shift/su_mean          0.002 
  
loop_ 
 _atom_site_label 
 _atom_site_type_symbol 
 _atom_site_fract_x 
 _atom_site_fract_y 
 _atom_site_fract_z 
 _atom_site_U_iso_or_equiv 
 _atom_site_adp_type 
 _atom_site_occupancy 
 _atom_site_symmetry_multiplicity 
 _atom_site_calc_flag 
 _atom_site_refinement_flags 
 _atom_site_disorder_assembly 
 _atom_site_disorder_group 
Au1 Au 0.01173(4) 0.386045(12) 0.54558(2) 0.01064(12) Uani 1 1 d . . . 
C8 C 0.1789(11) 0.4377(3) 0.5302(6) 0.0099(16) Uani 1 1 d . . . 
Au2 Au 0.23320(4) 0.606950(11) 0.24930(2) 0.01005(12) Uani 1 1 d . . . 
Fe2 Fe -0.4293(2) 0.2500 0.58759(12) 0.0060(3) Uani 1 2 d S . . 
Fe1 Fe 0.5000 0.5000 0.5000 0.0060(3) Uani 1 2 d S . . 
O1 O -0.5548(13) 0.2500 0.4495(7) 0.0160(19) Uani 1 2 d S . . 
O2 O -0.3519(14) 0.2500 0.7378(7) 0.019(2) Uani 1 2 d S . . 
H4 H -0.3145 0.2239 0.7532 0.029 Uiso 0.50 1 calc PR . . 
N1 N 0.4111(9) 0.5465(2) 0.5962(5) 0.0071(13) Uani 1 1 d . . . 
N3 N 0.3860(9) 0.5330(2) 0.3935(5) 0.0075(13) Uani 1 1 d . . . 
N4 N 0.2903(9) 0.4634(3) 0.5195(5) 0.0079(13) Uani 1 1 d . . . 
N5 N -0.2427(9) 0.3019(3) 0.5526(6) 0.0108(14) Uani 1 1 d . . . 
C1 C 0.4156(11) 0.5919(3) 0.5750(6) 0.0125(17) Uani 1 1 d . . . 
H1 H 0.4538 0.6011 0.5110 0.015 Uiso 1 1 calc R . . 
C7 C 0.3264(11) 0.5579(3) 0.3363(6) 0.0095(15) Uani 1 1 d . . . 
C10 C 0.1459(10) 0.6605(3) 0.1728(6) 0.0089(11) Uani 1 1 d . . . 
C9 C -0.1464(11) 0.3324(3) 0.5496(6) 0.0119(17) Uani 1 1 d . . . 
C3 C 0.3177(11) 0.6115(3) 0.7368(6) 0.0123(17) Uani 1 1 d . . . 
N6 N 0.0971(9) 0.6930(3) 0.1339(5) 0.0121(14) Uani 1 1 d . . . 
C5 C 0.3093(12) 0.5653(3) 0.7608(6) 0.0143(17) Uani 1 1 d . . . 
H5 H 0.2749 0.5553 0.8249 0.017 Uiso 1 1 calc R . . 
C2 C 0.3671(11) 0.6257(3) 0.6424(6) 0.0111(16) Uani 1 1 d . . . 
H2A H 0.3676 0.6572 0.6247 0.013 Uiso 1 1 calc R . . 
C6 C 0.3533(10) 0.5343(3) 0.6869(6) 0.0089(11) Uani 1 1 d . . . 
H6 H 0.3422 0.5025 0.7010 0.011 Uiso 1 1 calc R . . 
N2 N 0.2442(12) 0.6749(3) 0.8651(7) 0.0231(19) Uani 1 1 d . . . 
C4 C 0.2768(12) 0.6464(3) 0.8112(7) 0.0158(18) Uani 1 1 d . . . 
H3 H -0.61(2) 0.280(6) 0.430(11) 0.06(5) Uiso 1 1 d . . . 
  
loop_ 
 _atom_site_aniso_label 
 _atom_site_aniso_U_11 
 _atom_site_aniso_U_22 
 _atom_site_aniso_U_33 
 _atom_site_aniso_U_23 
 _atom_site_aniso_U_13 
 _atom_site_aniso_U_12 
Au1 0.00971(17) 0.00764(18) 0.01457(19) 0.00130(12) 0.00084(11) -0.00405(11) 
C8 0.011(4) 0.012(4) 0.006(3) 0.001(3) -0.003(3) 0.000(3) 
Au2 0.01474(19) 0.00567(18) 0.00975(18) 0.00136(12) -0.00281(11) 0.00205(11) 
Fe2 0.0073(7) 0.0027(7) 0.0079(7) 0.000 0.0003(6) 0.000 
Fe1 0.0077(7) 0.0042(8) 0.0061(7) 0.0010(6) -0.0002(5) -0.0013(6) 
O1 0.023(5) 0.008(4) 0.018(5) 0.000 -0.004(4) 0.000 
O2 0.027(5) 0.012(5) 0.020(5) 0.000 -0.011(4) 0.000 
N1 0.007(3) 0.007(3) 0.008(3) -0.002(3) -0.004(2) 0.001(3) 
N3 0.007(3) 0.007(3) 0.008(3) -0.001(3) 0.001(2) 0.001(3) 
N4 0.013(3) 0.007(3) 0.004(3) 0.000(3) 0.000(2) 0.001(3) 
N5 0.013(3) 0.001(3) 0.018(4) 0.000(3) -0.001(3) -0.001(3) 
C1 0.012(4) 0.015(4) 0.010(4) 0.004(3) -0.003(3) -0.004(3) 
C7 0.011(4) 0.005(4) 0.012(4) -0.004(3) 0.000(3) -0.001(3) 
C10 0.011(2) 0.005(3) 0.010(3) -0.001(2) 0.000(2) 0.003(2) 
C9 0.015(4) 0.013(4) 0.008(4) 0.000(3) 0.002(3) 0.003(3) 
C3 0.008(4) 0.018(5) 0.012(4) -0.003(3) 0.000(3) 0.002(3) 
N6 0.013(3) 0.010(3) 0.014(3) 0.000(3) 0.000(3) -0.001(3) 
C5 0.014(4) 0.018(5) 0.011(4) 0.002(4) 0.006(3) 0.002(4) 
C2 0.019(4) 0.002(4) 0.013(4) -0.001(3) 0.002(3) 0.004(3) 
C6 0.011(2) 0.005(3) 0.010(3) -0.001(2) 0.000(2) 0.003(2) 
N2 0.034(5) 0.011(4) 0.023(4) -0.008(4) 0.009(4) 0.000(3) 
C4 0.019(4) 0.011(4) 0.018(4) 0.001(4) 0.006(3) -0.002(4) 
  
_geom_special_details 
; 
 All esds (except the esd in the dihedral angle between two l.s. planes) 
 are estimated using the full covariance matrix.  The cell esds are taken 
 into account individually in the estimation of esds in distances, angles 
 and torsion angles; correlations between esds in cell parameters are only 
 used when they are defined by crystal symmetry.  An approximate (isotropic) 
 treatment of cell esds is used for estimating esds involving l.s. planes. 
; 
  
loop_ 
 _geom_bond_atom_site_label_1 
 _geom_bond_atom_site_label_2 
 _geom_bond_distance 
 _geom_bond_site_symmetry_2 
 _geom_bond_publ_flag 
Au1 C9 1.977(9) . ? 
Au1 C8 1.985(9) . ? 
Au1 Au2 3.3463(5) 5_566 ? 
Au1 Au2 3.3745(5) 2_565 ? 
C8 N4 1.143(11) . ? 
Au2 C7 1.983(9) . ? 
Au2 C10 1.989(8) . ? 
Au2 Au1 3.3463(5) 5_566 ? 
Au2 Au1 3.3745(5) 2_564 ? 
Fe2 O1 2.095(9) . ? 
Fe2 O2 2.112(9) . ? 
Fe2 N5 2.132(7) . ? 
Fe2 N5 2.132(7) 7_565 ? 
Fe2 N6 2.190(8) 8_556 ? 
Fe2 N6 2.190(8) 2_465 ? 
Fe1 N3 1.937(7) 5_666 ? 
Fe1 N3 1.937(7) . ? 
Fe1 N4 1.941(7) 5_666 ? 
Fe1 N4 1.941(7) . ? 
Fe1 N1 1.998(7) . ? 
Fe1 N1 1.998(7) 5_666 ? 
O1 H3 1.02(16) . ? 
O2 H4 0.8400 . ? 
N1 C6 1.350(10) . ? 
N1 C1 1.357(11) . ? 
N3 C7 1.154(11) . ? 
N5 C9 1.154(12) . ? 
C1 C2 1.391(12) . ? 
C1 H1 0.9500 . ? 
C10 N6 1.146(11) . ? 
C3 C5 1.390(13) . ? 
C3 C2 1.392(12) . ? 
C3 C4 1.463(13) . ? 
N6 Fe2 2.190(8) 2_464 ? 
C5 C6 1.388(12) . ? 
C5 H5 0.9500 . ? 
C2 H2A 0.9500 . ? 
C6 H6 0.9500 . ? 
N2 C4 1.134(13) . ? 
  
loop_ 
 _geom_angle_atom_site_label_1 
 _geom_angle_atom_site_label_2 
 _geom_angle_atom_site_label_3 
 _geom_angle 
 _geom_angle_site_symmetry_1 
 _geom_angle_site_symmetry_3 
 _geom_angle_publ_flag 
C9 Au1 C8 174.8(3) . . ? 
C9 Au1 Au2 71.7(2) . 5_566 ? 
C8 Au1 Au2 113.5(2) . 5_566 ? 
C9 Au1 Au2 112.2(2) . 2_565 ? 
C8 Au1 Au2 70.7(2) . 2_565 ? 
Au2 Au1 Au2 69.113(8) 5_566 2_565 ? 
N4 C8 Au1 171.7(8) . . ? 
C7 Au2 C10 174.2(3) . . ? 
C7 Au2 Au1 75.7(2) . 5_566 ? 
C10 Au2 Au1 101.2(2) . 5_566 ? 
C7 Au2 Au1 108.7(2) . 2_564 ? 
C10 Au2 Au1 73.9(2) . 2_564 ? 
Au1 Au2 Au1 172.907(16) 5_566 2_564 ? 
O1 Fe2 O2 169.1(4) . . ? 
O1 Fe2 N5 96.2(3) . . ? 
O2 Fe2 N5 91.5(3) . . ? 
O1 Fe2 N5 96.2(3) . 7_565 ? 
O2 Fe2 N5 91.5(3) . 7_565 ? 
N5 Fe2 N5 90.6(4) . 7_565 ? 
O1 Fe2 N6 89.3(3) . 8_556 ? 
O2 Fe2 N6 83.6(3) . 8_556 ? 
N5 Fe2 N6 173.4(3) . 8_556 ? 
N5 Fe2 N6 85.0(3) 7_565 8_556 ? 
O1 Fe2 N6 89.3(3) . 2_465 ? 
O2 Fe2 N6 83.6(3) . 2_465 ? 
N5 Fe2 N6 85.0(3) . 2_465 ? 
N5 Fe2 N6 173.4(3) 7_565 2_465 ? 
N6 Fe2 N6 98.9(4) 8_556 2_465 ? 
N3 Fe1 N3 180.000(2) 5_666 . ? 
N3 Fe1 N4 90.3(3) 5_666 5_666 ? 
N3 Fe1 N4 89.7(3) . 5_666 ? 
N3 Fe1 N4 89.7(3) 5_666 . ? 
N3 Fe1 N4 90.3(3) . . ? 
N4 Fe1 N4 180.0(4) 5_666 . ? 
N3 Fe1 N1 90.5(3) 5_666 . ? 
N3 Fe1 N1 89.5(3) . . ? 
N4 Fe1 N1 89.6(3) 5_666 . ? 
N4 Fe1 N1 90.4(3) . . ? 
N3 Fe1 N1 89.5(3) 5_666 5_666 ? 
N3 Fe1 N1 90.5(3) . 5_666 ? 
N4 Fe1 N1 90.4(3) 5_666 5_666 ? 
N4 Fe1 N1 89.6(3) . 5_666 ? 
N1 Fe1 N1 180.0(4) . 5_666 ? 
Fe2 O1 H3 115(9) . . ? 
Fe2 O2 H4 109.5 . . ? 
C6 N1 C1 117.3(7) . . ? 
C6 N1 Fe1 121.3(6) . . ? 
C1 N1 Fe1 121.2(6) . . ? 
C7 N3 Fe1 170.7(7) . . ? 
C8 N4 Fe1 172.3(7) . . ? 
C9 N5 Fe2 168.6(7) . . ? 
N1 C1 C2 123.2(8) . . ? 
N1 C1 H1 118.4 . . ? 
C2 C1 H1 118.4 . . ? 
N3 C7 Au2 172.9(7) . . ? 
N6 C10 Au2 175.8(8) . . ? 
N5 C9 Au1 178.0(8) . . ? 
C5 C3 C2 120.9(8) . . ? 
C5 C3 C4 120.4(8) . . ? 
C2 C3 C4 118.6(8) . . ? 
C10 N6 Fe2 161.7(7) . 2_464 ? 
C6 C5 C3 117.1(8) . . ? 
C6 C5 H5 121.5 . . ? 
C3 C5 H5 121.5 . . ? 
C1 C2 C3 117.4(8) . . ? 
C1 C2 H2A 121.3 . . ? 
C3 C2 H2A 121.3 . . ? 
N1 C6 C5 123.9(8) . . ? 
N1 C6 H6 118.1 . . ? 
C5 C6 H6 118.1 . . ? 
N2 C4 C3 176.6(11) . . ? 
  
loop_ 
 _geom_hbond_atom_site_label_D 
 _geom_hbond_atom_site_label_H 
 _geom_hbond_atom_site_label_A 
 _geom_hbond_distance_DH 
 _geom_hbond_distance_HA 
 _geom_hbond_distance_DA 
 _geom_hbond_angle_DHA 
 _geom_hbond_site_symmetry_A 
O1 H3 N2  1.02(16) 1.87(16) 2.862(11) 163(13) 2_464 
O2 H4 N6  0.84 2.43 3.090(11) 136.5 3_546 
  
_diffrn_measured_fraction_theta_max    0.999 
_diffrn_reflns_theta_full              28.31 
_diffrn_measured_fraction_theta_full   0.999 
_refine_diff_density_max    2.544 
_refine_diff_density_min   -1.846 
_refine_diff_density_rms    0.464 
