# Supplementary material
Source: MDPI journal article supplement (https://www.mdpi.com/2073-4352/8/11/415)
Supplement: s1 [file s1 › supplementary/1b_298K.cif]

  
data_test_0
# start Validation Reply Form: A issue
_vrf_PLAT971_test_0              
;
PROBLEM: Check Calcd Resid. Dens. 0.89A From Au1 3.54 eA-3

RESPONSE: This complex has the strong Au-Au polymeric interactions. So, the large
residual density would be contributed by the distribution of the delocalized
electron between Au-Au. Therefore, we could not any more refine Au atoms
appropriately. 

;

# end Validation Reply Form  
_audit_creation_method            SHELXL-97 
_chemical_name_systematic 
; 
 ? 
; 
_chemical_name_common             ? 
_chemical_melting_point           ? 
_chemical_formula_moiety          ? 
_chemical_formula_sum 
 'C20 H11 Au4 Fe2 N12 O2' 
_chemical_formula_weight          1350.97 
  
loop_ 
 _atom_type_symbol 
 _atom_type_description 
 _atom_type_scat_dispersion_real 
 _atom_type_scat_dispersion_imag 
 _atom_type_scat_source 
 'C'  'C'   0.0033   0.0016 
 'International Tables Vol C Tables 4.2.6.8 and 6.1.1.4' 
 'H'  'H'   0.0000   0.0000 
 'International Tables Vol C Tables 4.2.6.8 and 6.1.1.4' 
 'N'  'N'   0.0061   0.0033 
 'International Tables Vol C Tables 4.2.6.8 and 6.1.1.4' 
 'O'  'O'   0.0106   0.0060 
 'International Tables Vol C Tables 4.2.6.8 and 6.1.1.4' 
 'Fe'  'Fe'   0.3463   0.8444 
 'International Tables Vol C Tables 4.2.6.8 and 6.1.1.4' 
 'Au'  'Au'  -2.0133   8.8022 
 'International Tables Vol C Tables 4.2.6.8 and 6.1.1.4' 
  
_symmetry_cell_setting            Orthorhombic 
_symmetry_space_group_name_H-M    Pnma 
  
loop_ 
 _symmetry_equiv_pos_as_xyz 
 'x, y, z' 
 '-x+1/2, -y, z+1/2' 
 '-x, y+1/2, -z' 
 'x+1/2, -y+1/2, -z+1/2' 
 '-x, -y, -z' 
 'x-1/2, y, -z-1/2' 
 'x, -y-1/2, z' 
 '-x-1/2, y-1/2, z-1/2' 
  
_cell_length_a                    7.6273(7) 
_cell_length_b                    30.007(3) 
_cell_length_c                    13.7694(13) 
_cell_angle_alpha                 90.00 
_cell_angle_beta                  90.00 
_cell_angle_gamma                 90.00 
_cell_volume                      3151.5(5) 
_cell_formula_units_Z             4 
_cell_measurement_temperature     298(2) 
_cell_measurement_reflns_used     2615 
_cell_measurement_theta_min       2.52 
_cell_measurement_theta_max       26.60 
  
_exptl_crystal_description        block 
_exptl_crystal_colour             orange 
_exptl_crystal_size_max           0.15 
_exptl_crystal_size_mid           0.13 
_exptl_crystal_size_min           0.05 
_exptl_crystal_density_meas       'not measured' 
_exptl_crystal_density_diffrn     2.847 
_exptl_crystal_density_method     'not measured' 
_exptl_crystal_F_000              2396 
_exptl_absorpt_coefficient_mu     19.485 
_exptl_absorpt_correction_type    empirical 
_exptl_absorpt_correction_T_min   0.1581 
_exptl_absorpt_correction_T_max   0.4425 
_exptl_absorpt_process_details    'SASABS; Sheldrick 1996' 
  
_exptl_special_details 
; 
 ? 
; 
  
_diffrn_ambient_temperature       298(2) 
_diffrn_radiation_wavelength      0.71073 
_diffrn_radiation_type            MoK\a 
_diffrn_radiation_source          'fine-focus sealed tube' 
_diffrn_radiation_monochromator   graphite 
_diffrn_measurement_device_type   'CCD area detector' 
_diffrn_measurement_method        'phi and omega scans' 
_diffrn_detector_area_resol_mean  8.333 
_diffrn_standards_number          ? 
_diffrn_standards_interval_count  ? 
_diffrn_standards_interval_time   ? 
_diffrn_standards_decay_%         0 
_diffrn_reflns_number             19996 
_diffrn_reflns_av_R_equivalents   0.0796 
_diffrn_reflns_av_sigmaI/netI     0.0690 
_diffrn_reflns_limit_h_min        -10 
_diffrn_reflns_limit_h_max        8 
_diffrn_reflns_limit_k_min        -36 
_diffrn_reflns_limit_k_max        40 
_diffrn_reflns_limit_l_min        -18 
_diffrn_reflns_limit_l_max        12 
_diffrn_reflns_theta_min          2.52 
_diffrn_reflns_theta_max          28.28 
_reflns_number_total              3976 
_reflns_number_gt                 2800 
_reflns_threshold_expression      >2sigma(I) 
  
_computing_data_collection        'Bruker SMART' 
_computing_cell_refinement        'Bruker SMART' 
_computing_data_reduction         'Bruker SAINT' 
_computing_structure_solution     'SHELXS-97 (Sheldrick, 1990)' 
_computing_structure_refinement   'SHELXL-97 (Sheldrick, 1997)' 
_computing_molecular_graphics     'Bruker SHELXTL' 
_computing_publication_material   'Bruker SHELXTL' 
  
_refine_special_details 
; 
 Refinement of F^2^ against ALL reflections.  The weighted R-factor wR and 
 goodness of fit S are based on F^2^, conventional R-factors R are based 
 on F, with F set to zero for negative F^2^. The threshold expression of 
 F^2^ > 2sigma(F^2^) is used only for calculating R-factors(gt) etc. and is 
 not relevant to the choice of reflections for refinement.  R-factors based 
 on F^2^ are statistically about twice as large as those based on F, and R- 
 factors based on ALL data will be even larger. 
; 
  
_refine_ls_structure_factor_coef  Fsqd 
_refine_ls_matrix_type            full 
_refine_ls_weighting_scheme       calc 
_refine_ls_weighting_details 
 'calc w=1/[\s^2^(Fo^2^)+(0.0730P)^2^+0.0000P] where P=(Fo^2^+2Fc^2^)/3' 
_atom_sites_solution_primary      direct 
_atom_sites_solution_secondary    difmap 
_atom_sites_solution_hydrogens    geom 
_refine_ls_hydrogen_treatment     mixed 
_refine_ls_extinction_method      none 
_refine_ls_extinction_coef        ? 
_refine_ls_number_reflns          3976 
_refine_ls_number_parameters      196 
_refine_ls_number_restraints      0 
_refine_ls_R_factor_all           0.0730 
_refine_ls_R_factor_gt            0.0474 
_refine_ls_wR_factor_ref          0.1346 
_refine_ls_wR_factor_gt           0.1168 
_refine_ls_goodness_of_fit_ref    0.965 
_refine_ls_restrained_S_all       0.965 
_refine_ls_shift/su_max           0.020 
_refine_ls_shift/su_mean          0.002 
  
loop_ 
 _atom_site_label 
 _atom_site_type_symbol 
 _atom_site_fract_x 
 _atom_site_fract_y 
 _atom_site_fract_z 
 _atom_site_U_iso_or_equiv 
 _atom_site_adp_type 
 _atom_site_occupancy 
 _atom_site_symmetry_multiplicity 
 _atom_site_calc_flag 
 _atom_site_refinement_flags 
 _atom_site_disorder_assembly 
 _atom_site_disorder_group 
Au1 Au -0.00782(4) 0.617956(13) 0.45196(3) 0.03476(14) Uani 1 1 d . . . 
Au2 Au 0.73576(5) 0.610923(12) 0.25319(2) 0.03222(14) Uani 1 1 d . . . 
Fe1 Fe 1.0000 0.5000 0.0000 0.0211(4) Uani 1 2 d S . . 
Fe2 Fe 0.4323(2) 0.7500 0.41092(12) 0.0232(4) Uani 1 2 d S . . 
N1 N 0.9015(10) 0.5515(2) -0.1029(5) 0.0317(17) Uani 1 1 d . . . 
N6 N 0.5998(10) 0.6947(2) 0.3651(5) 0.0329(17) Uani 1 1 d . . . 
N4 N 0.7678(10) 0.4610(3) -0.0220(5) 0.0339(18) Uani 1 1 d . . . 
C1 C 0.9010(14) 0.5948(3) -0.0800(7) 0.039(2) Uani 1 1 d . . . 
H1 H 0.9325 0.6029 -0.0172 0.047 Uiso 1 1 calc R . . 
N3 N 0.8794(10) 0.5352(3) 0.1190(5) 0.0345(18) Uani 1 1 d . . . 
C7 C 0.8230(11) 0.5608(3) 0.1717(6) 0.0282(19) Uani 1 1 d . . . 
C2 C 0.8567(14) 0.6276(4) -0.1438(7) 0.045(3) Uani 1 1 d . . . 
H2 H 0.8529 0.6573 -0.1242 0.054 Uiso 1 1 calc R . . 
C10 C 0.6488(12) 0.6634(3) 0.3276(6) 0.032(2) Uani 1 1 d . . . 
O1 O 0.553(2) 0.7500 0.5461(9) 0.050(3) Uani 1 2 d S . . 
O2 O 0.3546(19) 0.7500 0.2602(7) 0.061(3) Uani 1 2 d S . . 
H4A H 0.3770 0.7257 0.2360 0.092 Uiso 0.50 1 calc PR . . 
N5 N 0.2428(11) 0.7000(3) 0.4433(6) 0.041(2) Uani 1 1 d . . . 
C8 C 0.6677(12) 0.4338(3) -0.0334(6) 0.034(2) Uani 1 1 d . . . 
C3 C 0.8165(14) 0.6154(3) -0.2404(7) 0.039(2) Uani 1 1 d . . . 
C5 C 0.8137(15) 0.5712(4) -0.2649(7) 0.046(3) Uani 1 1 d . . . 
H5 H 0.7831 0.5622 -0.3273 0.055 Uiso 1 1 calc R . . 
C6 C 0.8575(14) 0.5400(4) -0.1944(7) 0.044(3) Uani 1 1 d . . . 
C4 C 0.7775(16) 0.6504(4) -0.3095(8) 0.058(3) Uani 1 1 d . . . 
C9 C 0.1474(12) 0.6707(3) 0.4470(7) 0.033(2) Uani 1 1 d . . . 
N2 N 0.7426(16) 0.6766(4) -0.3651(8) 0.080(4) Uani 1 1 d . . . 
H3 H 0.583(16) 0.731(4) 0.567(8) 0.06(4) Uiso 1 1 d . . . 
H6 H 0.841(14) 0.509(4) -0.209(7) 0.05(3) Uiso 1 1 d . . . 
  
loop_ 
 _atom_site_aniso_label 
 _atom_site_aniso_U_11 
 _atom_site_aniso_U_22 
 _atom_site_aniso_U_33 
 _atom_site_aniso_U_23 
 _atom_site_aniso_U_13 
 _atom_site_aniso_U_12 
Au1 0.0328(2) 0.0260(2) 0.0454(3) 0.00368(16) 0.00238(15) -0.01175(14) 
Au2 0.0463(3) 0.0195(2) 0.0309(2) -0.00305(13) 0.00651(16) 0.00609(14) 
Fe1 0.0280(9) 0.0148(8) 0.0205(8) -0.0042(6) 0.0007(6) -0.0028(6) 
Fe2 0.0278(9) 0.0119(8) 0.0298(9) 0.000 0.0022(7) 0.000 
N1 0.043(5) 0.017(4) 0.035(4) 0.004(3) 0.000(4) -0.001(3) 
N6 0.041(5) 0.019(4) 0.039(4) -0.004(3) 0.001(4) 0.000(3) 
N4 0.038(4) 0.029(5) 0.035(4) -0.007(3) 0.002(3) -0.013(4) 
C1 0.056(7) 0.027(5) 0.033(5) 0.001(4) 0.003(5) 0.008(5) 
N3 0.045(5) 0.025(4) 0.034(4) -0.004(3) 0.002(4) 0.005(3) 
C7 0.037(5) 0.021(5) 0.026(4) 0.001(3) -0.003(4) 0.003(4) 
C2 0.056(7) 0.031(6) 0.048(6) 0.006(5) 0.005(5) 0.011(5) 
C10 0.038(5) 0.025(5) 0.032(4) -0.002(4) -0.002(4) 0.005(4) 
O1 0.075(9) 0.037(8) 0.038(6) 0.000 -0.017(6) 0.000 
O2 0.095(9) 0.041(7) 0.047(6) 0.000 -0.038(6) 0.000 
N5 0.042(5) 0.022(5) 0.059(5) -0.002(4) 0.006(4) -0.003(4) 
C8 0.031(5) 0.039(6) 0.032(5) -0.014(4) 0.011(4) -0.009(4) 
C3 0.033(6) 0.041(6) 0.043(6) 0.013(4) -0.004(4) 0.006(4) 
C5 0.059(7) 0.045(7) 0.035(5) 0.007(5) -0.018(5) 0.001(5) 
C6 0.057(7) 0.035(6) 0.040(6) 0.000(5) -0.017(5) -0.007(5) 
C4 0.057(7) 0.067(9) 0.049(7) 0.012(6) -0.011(6) 0.002(6) 
C9 0.036(5) 0.025(5) 0.040(5) 0.000(4) 0.002(4) -0.007(4) 
N2 0.104(10) 0.069(9) 0.066(7) 0.028(6) -0.015(7) 0.013(7) 
  
_geom_special_details 
; 
 All esds (except the esd in the dihedral angle between two l.s. planes) 
 are estimated using the full covariance matrix.  The cell esds are taken 
 into account individually in the estimation of esds in distances, angles 
 and torsion angles; correlations between esds in cell parameters are only 
 used when they are defined by crystal symmetry.  An approximate (isotropic) 
 treatment of cell esds is used for estimating esds involving l.s. planes. 
; 
  
loop_ 
 _geom_bond_atom_site_label_1 
 _geom_bond_atom_site_label_2 
 _geom_bond_distance 
 _geom_bond_site_symmetry_2 
 _geom_bond_publ_flag 
Au1 C8 1.985(9) 2_565 ? 
Au1 C9 1.978(9) . ? 
Au1 Au2 3.3705(6) 1_455 ? 
Au2 C7 1.992(9) . ? 
Au2 C10 1.992(9) . ? 
Au2 Au1 3.3705(6) 1_655 ? 
Fe1 N4 2.144(7) . ? 
Fe1 N4 2.144(7) 5_765 ? 
Fe1 N3 2.157(7) . ? 
Fe1 N3 2.157(7) 5_765 ? 
Fe1 N1 2.226(7) 5_765 ? 
Fe1 N1 2.226(7) . ? 
Fe2 O1 2.078(13) . ? 
Fe2 N5 2.130(8) . ? 
Fe2 N5 2.130(8) 7_575 ? 
Fe2 O2 2.158(9) . ? 
Fe2 N6 2.187(8) . ? 
Fe2 N6 2.187(8) 7_575 ? 
N1 C1 1.338(11) . ? 
N1 C6 1.349(12) . ? 
N6 C10 1.135(11) . ? 
N4 C8 1.129(11) . ? 
C1 C2 1.362(13) . ? 
C1 H1 0.9300 . ? 
N3 C7 1.139(11) . ? 
C2 C3 1.414(13) . ? 
C2 H2 0.9300 . ? 
O1 H3 0.68(11) . ? 
O2 H4A 0.8200 . ? 
N5 C9 1.142(12) . ? 
C8 Au1 1.985(9) 2_564 ? 
C3 C5 1.371(14) . ? 
C3 C4 1.447(14) . ? 
C5 C6 1.389(14) . ? 
C5 H5 0.9300 . ? 
C6 H6 0.95(11) . ? 
C4 N2 1.129(14) . ? 
  
loop_ 
 _geom_angle_atom_site_label_1 
 _geom_angle_atom_site_label_2 
 _geom_angle_atom_site_label_3 
 _geom_angle 
 _geom_angle_site_symmetry_1 
 _geom_angle_site_symmetry_3 
 _geom_angle_publ_flag 
C8 Au1 C9 175.9(4) 2_565 . ? 
C8 Au1 Au2 71.2(2) 2_565 1_455 ? 
C9 Au1 Au2 111.7(3) . 1_455 ? 
C7 Au2 C10 176.6(3) . . ? 
C7 Au2 Au1 108.1(2) . 1_655 ? 
C10 Au2 Au1 74.1(3) . 1_655 ? 
N4 Fe1 N4 180.0(4) . 5_765 ? 
N4 Fe1 N3 91.3(3) . . ? 
N4 Fe1 N3 88.7(3) 5_765 . ? 
N4 Fe1 N3 88.7(3) . 5_765 ? 
N4 Fe1 N3 91.3(3) 5_765 5_765 ? 
N3 Fe1 N3 180.0(3) . 5_765 ? 
N4 Fe1 N1 89.5(3) . 5_765 ? 
N4 Fe1 N1 90.5(3) 5_765 5_765 ? 
N3 Fe1 N1 90.0(3) . 5_765 ? 
N3 Fe1 N1 90.0(3) 5_765 5_765 ? 
N4 Fe1 N1 90.5(3) . . ? 
N4 Fe1 N1 89.5(3) 5_765 . ? 
N3 Fe1 N1 90.0(3) . . ? 
N3 Fe1 N1 90.0(3) 5_765 . ? 
N1 Fe1 N1 180.0(3) 5_765 . ? 
O1 Fe2 N5 96.6(4) . . ? 
O1 Fe2 N5 96.6(4) . 7_575 ? 
N5 Fe2 N5 89.5(5) . 7_575 ? 
O1 Fe2 O2 169.5(6) . . ? 
N5 Fe2 O2 90.8(4) . . ? 
N5 Fe2 O2 90.8(4) 7_575 . ? 
O1 Fe2 N6 89.9(3) . . ? 
N5 Fe2 N6 85.6(3) . . ? 
N5 Fe2 N6 172.3(3) 7_575 . ? 
O2 Fe2 N6 83.3(3) . . ? 
O1 Fe2 N6 89.9(3) . 7_575 ? 
N5 Fe2 N6 172.3(3) . 7_575 ? 
N5 Fe2 N6 85.6(3) 7_575 7_575 ? 
O2 Fe2 N6 83.3(3) . 7_575 ? 
N6 Fe2 N6 98.7(4) . 7_575 ? 
C1 N1 C6 117.9(8) . . ? 
C1 N1 Fe1 121.7(6) . . ? 
C6 N1 Fe1 120.1(6) . . ? 
C10 N6 Fe2 162.0(8) . . ? 
C8 N4 Fe1 166.6(8) . . ? 
N1 C1 C2 123.5(9) . . ? 
N1 C1 H1 118.3 . . ? 
C2 C1 H1 118.3 . . ? 
C7 N3 Fe1 167.1(8) . . ? 
N3 C7 Au2 173.2(8) . . ? 
C1 C2 C3 118.3(10) . . ? 
C1 C2 H2 120.9 . . ? 
C3 C2 H2 120.9 . . ? 
N6 C10 Au2 175.9(8) . . ? 
Fe2 O1 H3 121(10) . . ? 
Fe2 O2 H4A 109.5 . . ? 
C9 N5 Fe2 169.6(8) . . ? 
N4 C8 Au1 174.7(9) . 2_564 ? 
C5 C3 C2 119.0(9) . . ? 
C5 C3 C4 122.6(10) . . ? 
C2 C3 C4 118.4(10) . . ? 
C3 C5 C6 118.5(9) . . ? 
C3 C5 H5 120.7 . . ? 
C6 C5 H5 120.7 . . ? 
N1 C6 C5 122.7(10) . . ? 
N1 C6 H6 119(6) . . ? 
C5 C6 H6 118(6) . . ? 
N2 C4 C3 177.3(15) . . ? 
N5 C9 Au1 177.1(9) . . ? 
  
loop_ 
 _geom_hbond_atom_site_label_D 
 _geom_hbond_atom_site_label_H 
 _geom_hbond_atom_site_label_A 
 _geom_hbond_distance_DH 
 _geom_hbond_distance_HA 
 _geom_hbond_distance_DA 
 _geom_hbond_angle_DHA 
 _geom_hbond_site_symmetry_A 
O1 H3 N2  0.68(11) 2.24(11) 2.903(14) 165(15) 1_556 
O2 H4A N6  0.82 2.70 3.083(12) 110.7 6_556 
  
_diffrn_measured_fraction_theta_max    0.999 
_diffrn_reflns_theta_full              28.28 
_diffrn_measured_fraction_theta_full   0.999 
_refine_diff_density_max    3.009 
_refine_diff_density_min   -2.946 
_refine_diff_density_rms    0.325 
