# Supplementary material
Source: MDPI journal article supplement (https://www.mdpi.com/2073-4352/8/11/415)
Supplement: s1 [file s1 › supplementary/SI.pdf]

# Supplementary Information of

**Takashi Kosone <sup>1,\*</sup>, Itaru Tomori <sup>2</sup>, Daisuke Akahoshi <sup>3,4</sup>, Toshiaki Saito <sup>3,4</sup> and Takafumi Kitazawa <sup>3,4</sup>**

<sup>1</sup> Department of Creative Technology Engineering Course of Chemical Engineering, Anan College, 265 Aoki, Minobayashi, Anan, Tokushima 774-0017, Japan

<sup>2</sup> Department of Chemistry, Faculty of Science, Toho University, 2-2-1 Miyama, Funabashi, Chiba 274-8510, Japan; kitazawa@chem.sci.toho-u.ac.jp

<sup>3</sup> Department of Physics, Faculty of Science, Toho University, 2-2-1, Miyama 274-8510, Japan

\* Correspondence: kosone@anan-nct.ac.jp; Tel.: +81-884-23-7195

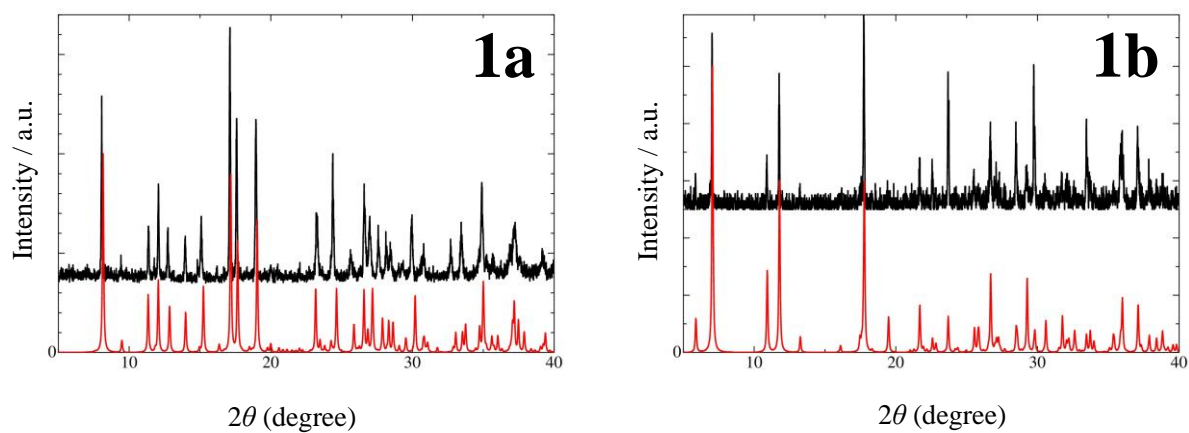

**Figure S1.** X-ray powder diffraction data of **1a** and **1b** (red line: calculation, black line: experiment).

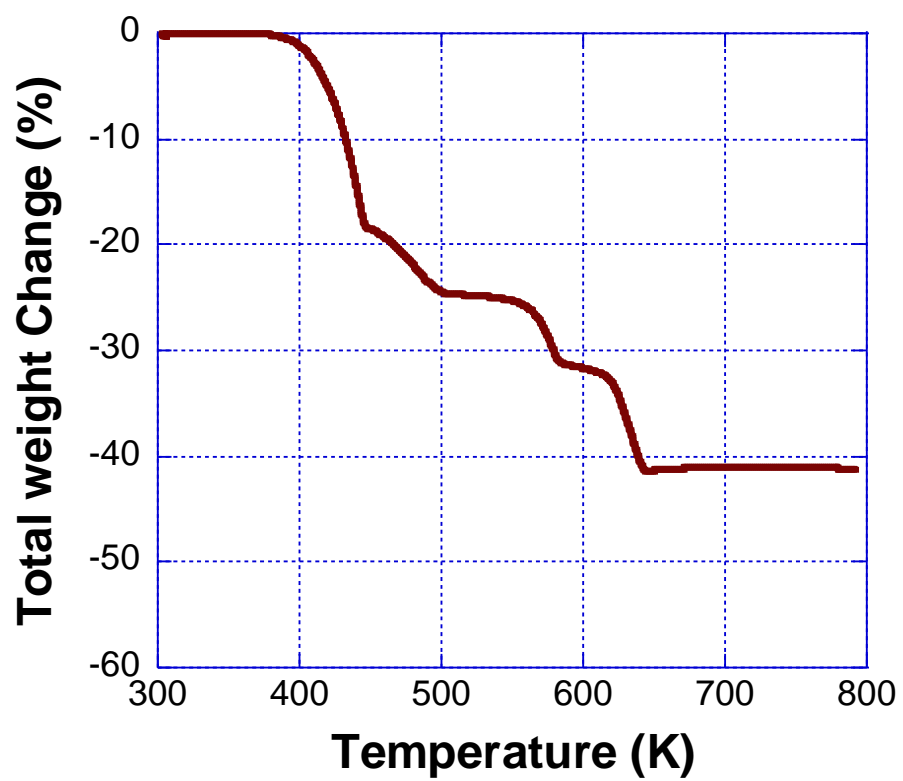

**Figure S2.** Thermogravimetric analysis for complex **1a** was carried under nitrogen atmosphere at a heating rate of 10 K/min.

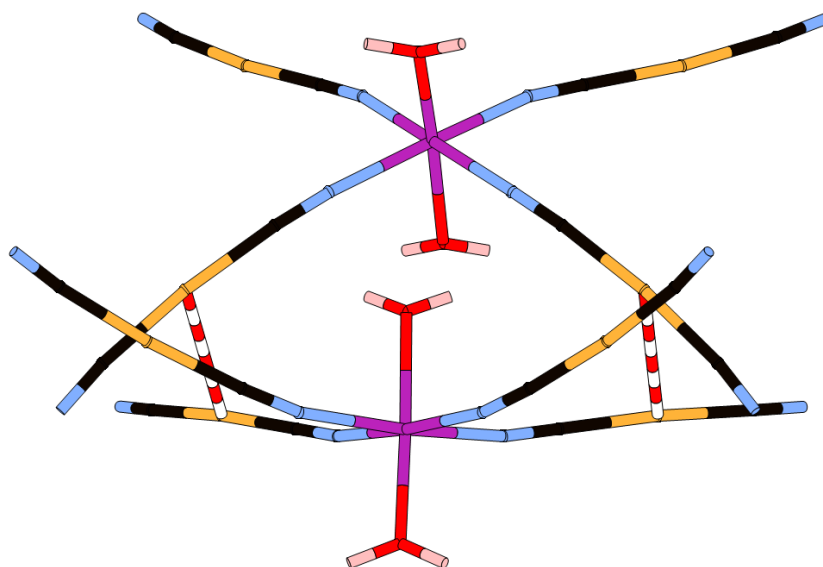

**Figure S3.** Showing the closet approach between Fe(2) centers for **1b** at 90 K.
